# Supplementary material
Source: Springer Nature journal article supplement (https://www.springermedizin.de/resource/supplementary/12984_2012_442_MOESM5_ESM.pdf/9604748)

Difference between Optipush (OP) and Smartwheel (SW) split out to subjects and blocks

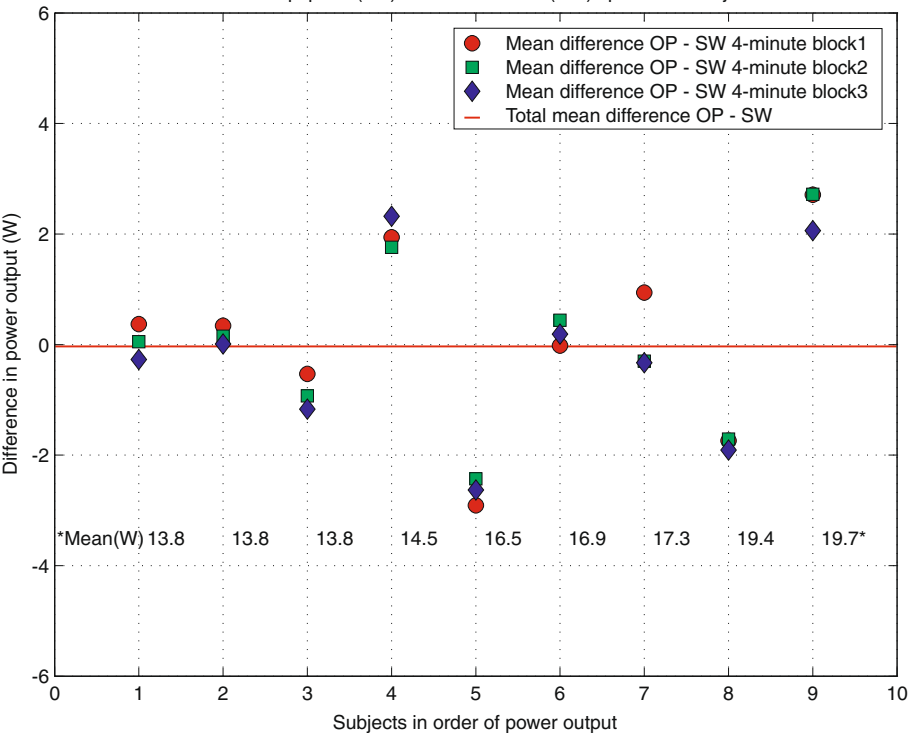

Supplement: MOESM5 [file 9604748]
